# Supplementary material for: Silver nanowire transparent conducting paper-based electrode with high optical haze
Source: Royal Society of Chemistry journal article supplement (doi:10.1039/c3tc31726a), 2013-10-09
Supplement: c3tc31726a.pdf [file c3tc31726a.pdf]

### Supplementary Materials

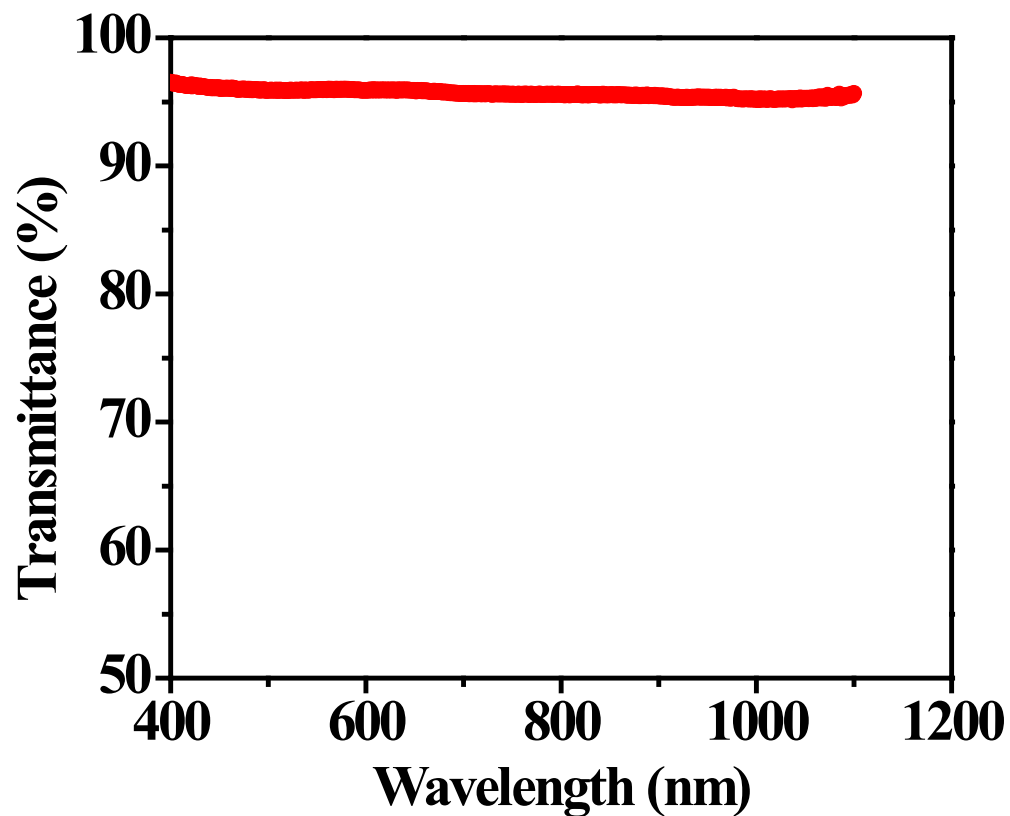

S1) The transmittance curve for the paper substrate before a Ag NW network is embedded into the surface

| # of Tape Peels | Sheet Resistance $\Omega/\text{sq}$ |
|-----------------|-------------------------------------|
| 0               | 13                                  |
| 1               | 14                                  |
| 2               | 19                                  |
| 3               | 20                                  |
| 4               | 20                                  |
| 5               | 21                                  |
| 6               | 23                                  |
| 7               | 23                                  |
| 8               | 24                                  |
| 9               | 24                                  |
| 10              | 25                                  |

S2) The tabulated results for the tape test measurement on the Ag NW paper TCE sample.

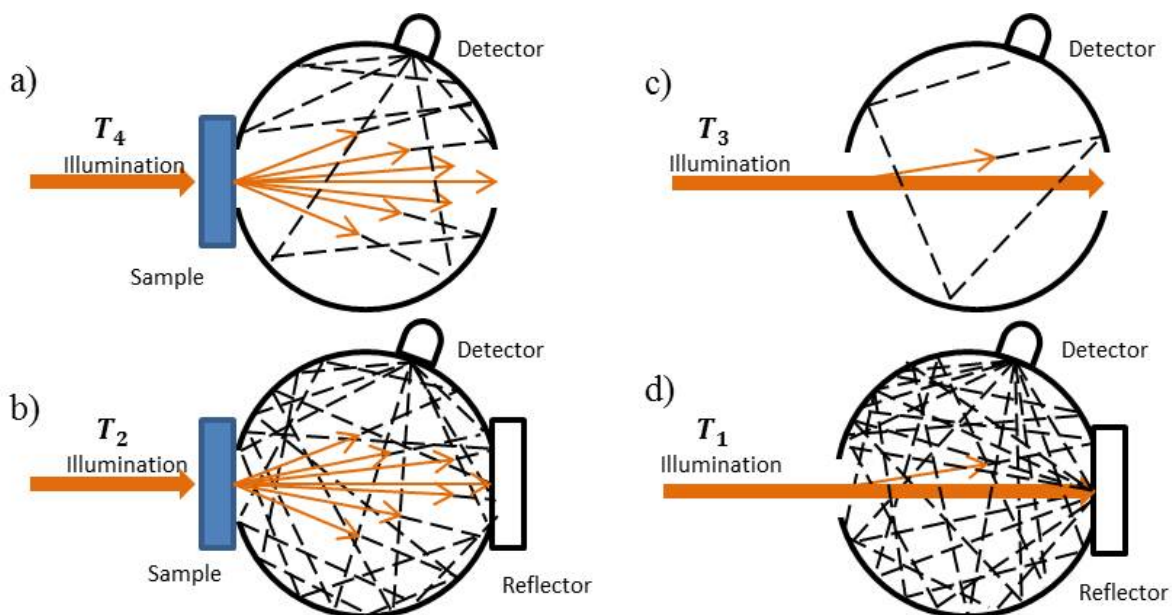

**S3)** The experimental haze measurement setup with the UV-Vis spectrometer, **(a)** total forward scattered illumination, **(b)** total transmitted illumination, **(c)** and **(d)** are the corrections for the experimental setup.
